# Supplementary material for: Upconversion fluorescence of MXene nanosheets and the sensitive detection of l-tryptophan
Source: Royal Society of Chemistry journal article supplement (doi:10.1039/d2sd00107a), 2022-01-01
Supplement: d2sd00107a1.pdf [file d2sd00107a1.pdf]

## **Upconversion Fluorescence of MXenes Nanosheets and the Sensitive Detection of L-Tryptophan**

Feng Wang<sup>a,c</sup>, Hongye Wang<sup>a</sup>, Xiaoqiang Cui<sup>b\*</sup>, Yang Liu<sup>a\*</sup>

<sup>a</sup>Department of Chemistry, Key Laboratory of Bioorganic Phosphorus Chemistry & Chemical Biology, Tsinghua University, Beijing 100084, P. R. China.

<sup>b</sup>School of Materials Science and Engineering, State Key Laboratory of Automotive Simulation and Control and Key Laboratory of Automobile Materials of MOE, Jilin University, 2699 Qianjin Street, Changchun 130012, Jilin, China.

<sup>c</sup>Shenzhen Key Laboratory of Energy Materials for Carbon Neutrality, Shenzhen Institutes of Advanced Technology, Chinese Academy of Sciences, Shenzhen, 518055, China

### **Corresponding Author**

xqcui@jlu.edu.cn (XQ Cui), liu-yang@mail.tsinghua.edu.cn (Y Liu)

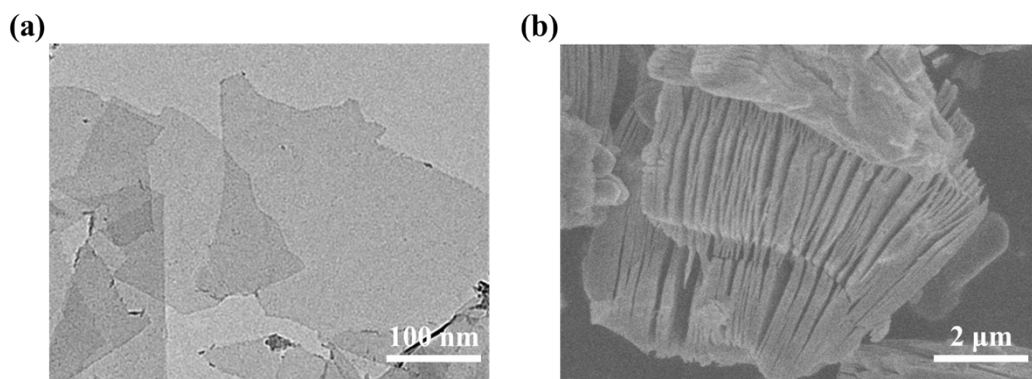

**Fig.S1** (a) TEM image of Ti<sub>3</sub>C<sub>2</sub> nanosheets. (b) SEM image of accordion-like Ti<sub>3</sub>C<sub>2</sub>.

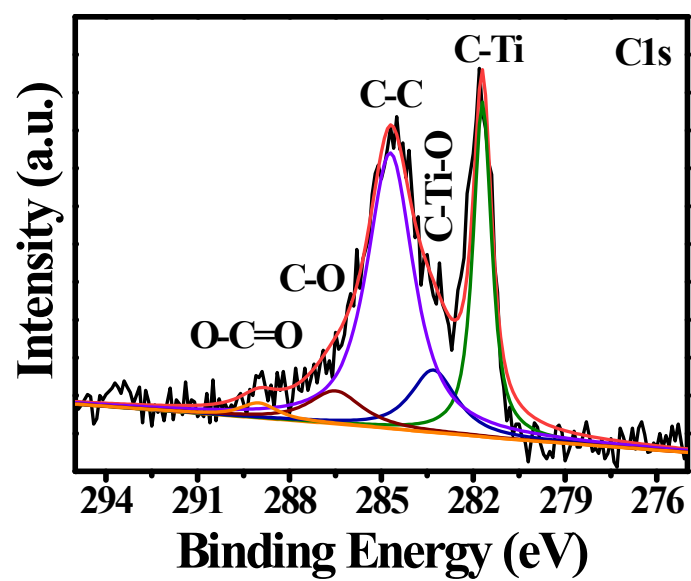

**Fig.S2** High-resolution XPS spectrum of C 1s of Ti<sub>3</sub>C<sub>2</sub> nanosheets.

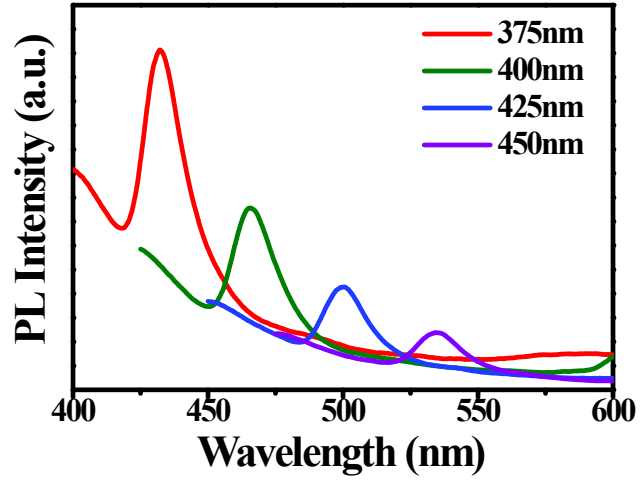

Fig.S3 Fluorescence emission spectra of  $\text{Ti}_3\text{C}_2$  nanosheets in an aqueous solution at different excitation wavelengths.

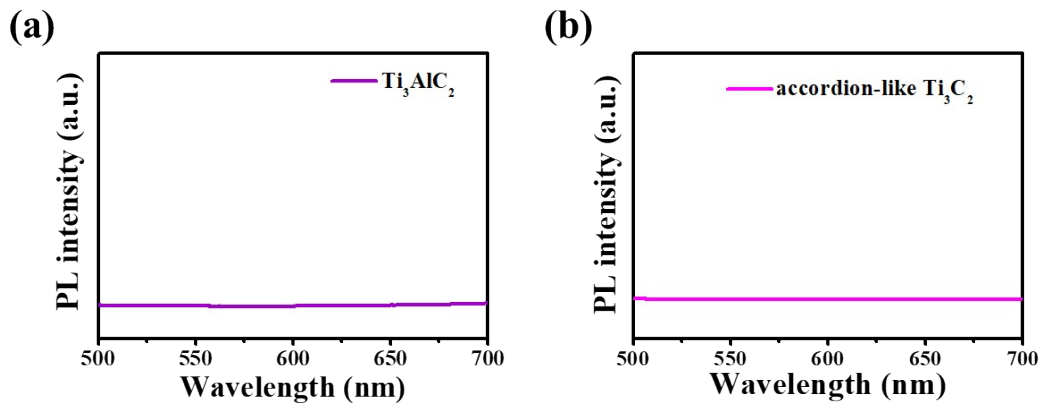

Fig.S4 The fluorescence emission spectra of a)  $\text{Ti}_3\text{AlC}_2$  powder and b) accordion-like  $\text{Ti}_3\text{C}_2$ .

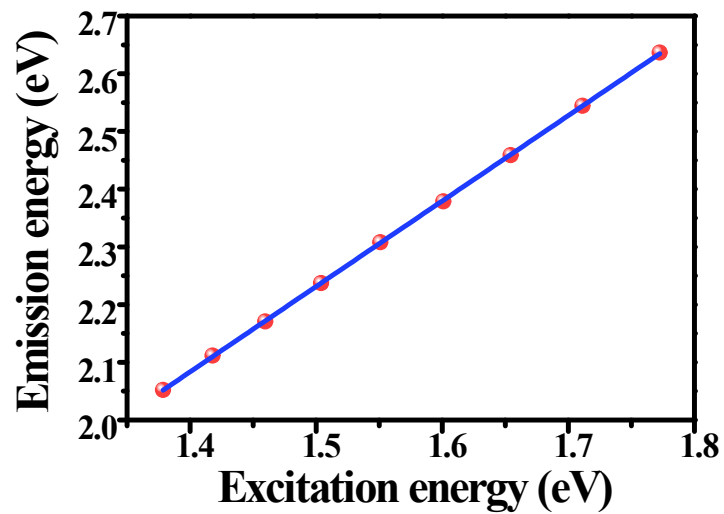

Fig.S5 The relationship between the energy of emission light and excitation light.

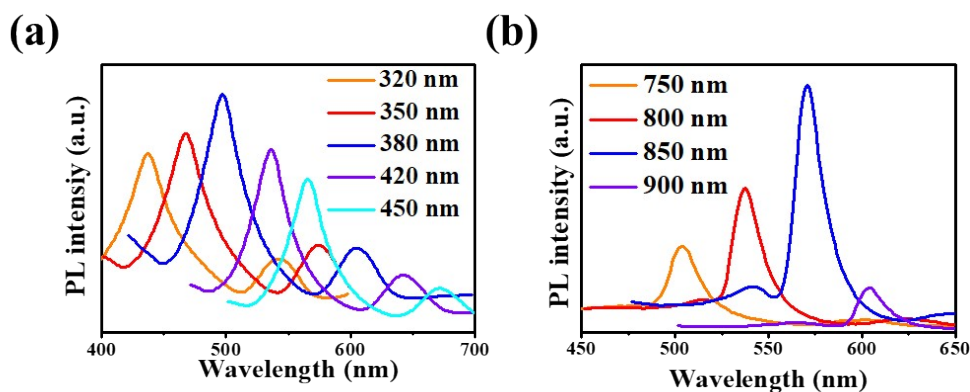

**Fig.S6** (a) Fluorescence emission spectra of  $Ti_3C_2$  nanosheets stripped by TMAOH at different wavelength (320 nm to 450 nm) excitation. (b) Fluorescence emission spectra of  $Ti_3C_2$  nanosheet stripped by TMAOH at different wavelength (750 nm to 900 nm) excitation.

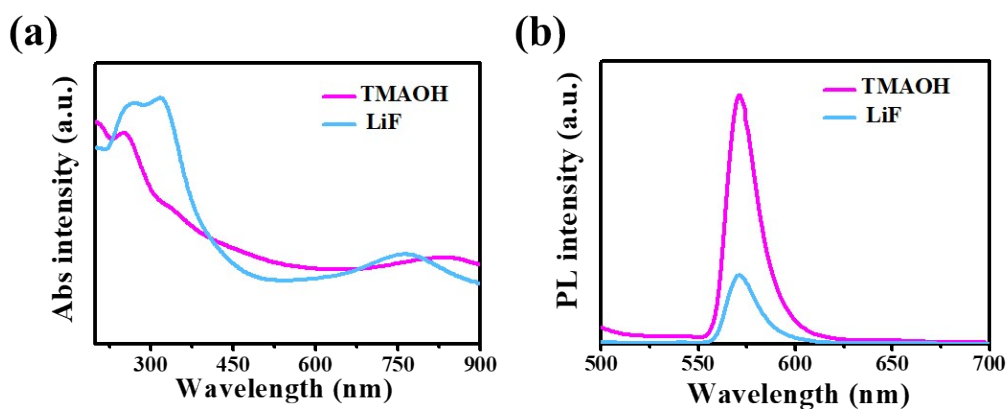

**Fig.S7** (a) The UV-Vis spectra of the  $Ti_3C_2$  nanosheets prepared by LiF and HCl and S- $Ti_3C_2$  NPs. (b) The fluorescence emission spectra of the  $Ti_3C_2$  nanosheets prepared by LiF and HCl and S- $Ti_3C_2$  NPs at 850 nm.

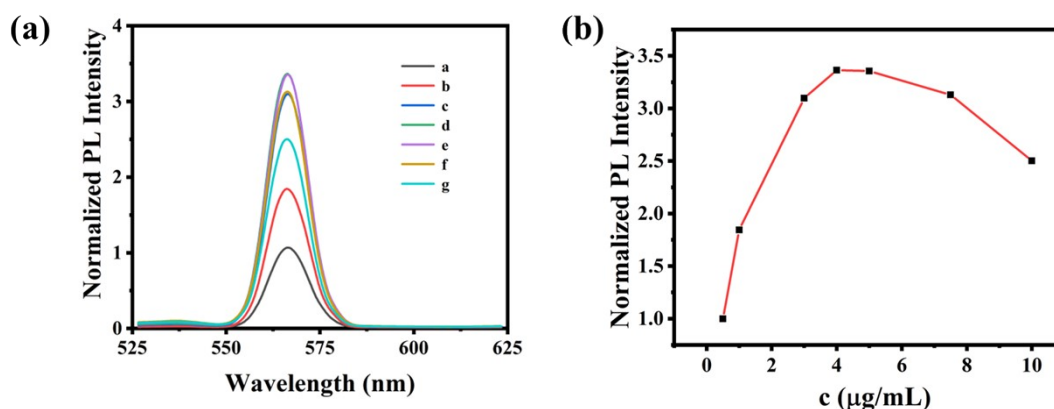

**Fig.S8** (a) The normalized fluorescence emission spectra of  $Ti_3C_2$  nanosheets at different concentration (a-g: 0.5, 1, 3, 4, 5, 7.5, 10  $\mu\text{g/mL}$ , respectively). (b) Plots of relative normalized PL intensity vs the concentration of  $Ti_3C_2$  nanosheets

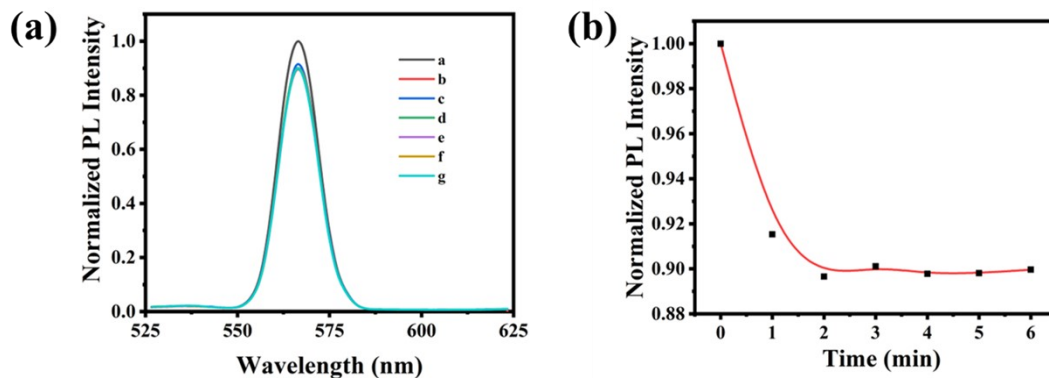

**Fig.S9** (a) The fluorescence emission spectra of 4  $\mu\text{g/mL}$   $\text{Ti}_3\text{C}_2$  with 500 nM L-Tryptophen at different incubation time (a-g: 0, 1, 2, 3, 4, 5, 6 min, respectively). (b) Plots of relative normalized PL intensity vs incubation time.

| Method              | materials                                                                           | linear range                                            | Detection limit         | Reference |
|---------------------|-------------------------------------------------------------------------------------|---------------------------------------------------------|-------------------------|-----------|
| Electrochemical     | $\text{Cu}_2\text{O}$ nanoparticles- coated reduced graphene oxide nanocomposite    | 0.02-20 $\mu\text{M}$                                   | 0.01 $\mu\text{M}$      | [1]       |
| Chronoamperometry   | Conductor polymer polypyrrole doped with potassium hexacyanoferrate (II)            | $3.3 \times 10^{-7}$ -<br>$1.06 \times 10^{-5}$ M       | $1.05 \times 10^{-7}$ M | [2]       |
| Electrocatalytic    | $\text{Fe}_3\text{O}_4/\text{C}$ composite                                          | 1.0-80 $\mu\text{M}$ and<br>80-800 $\mu\text{M}$        | 0.26 $\mu\text{M}$      | [3]       |
| Cyclic voltammetry  | Polymethionine modified carbon nanotube                                             | $1.5 - 8.0 \times 10^{-5}$<br>M                         | $6.99 \times 10^{-7}$ M | [4]       |
| Electrochemical     | Exfoliated graphene and poly (3,4-ethylenedioxythiophene): poly (styrene sulfonate) | 0.1-100 $\mu\text{M}$<br>and 100-<br>1000 $\mu\text{M}$ | 0.015 $\mu\text{M}$     | [5]       |
| Voltammetric        | Silver dendrites decorated polythiophene nanocomposite                              | 200 nM-400<br>$\mu\text{M}$                             | 20 nM                   | [6]       |
| Colorimetric method | purified tryptophanases                                                             | 100 $\mu\text{M}$ to<br>600 $\mu\text{M}$               | 100 $\mu\text{M}$       | [7]       |
| Fluorescence        | the TF-Splinting Duplex                                                             | 0-100 $\mu\text{M}$                                     | 790 nM                  | [8]       |
| Fluorescence        | Single layer of MXene ( $\text{Ti}_3\text{C}_2$ ) nanosheets                        | 0-5 $\mu\text{M}$                                       | 91 nM                   | Our work  |

Table. S1 The detection performance of sensors based on different nanomaterials for L-Tryptophan.

## References

1. Q. He, Y. Tian, Y. Wu, J. Liu, D. Chen, *Biomolecules*, 2019, **9**, 176.
2. A. Dinu, C. Apetrei, *Inventions*, 2021, **6**, 56.
3. J. Liu, S. Dong, Q. He, S. Yang, G. Li, *Biomolecules*, 2019, **9**, 245.
4. N. S. Prinith, J. G. Manjunatha, *J. Electrochem. Sci. Eng.* 2020, **10**, 305-315.
5. S. Duan, W. Wang, C. Yu, M. Liu, L. Yu, *Nano.*, 2019, **14**, 1950058.
6. S. D. Gunavathana, P. Thivya, J. Wilson, A. C. Peter, *J. Mol. Struct.*, 2019, **1205**, 127649.
7. Y. N. Wu, T. M. Wang, C. Zhang, X. H. Xing, *Talanta*, 2018, **176**, 604-609.
8. X. Y. Duan, Z. W. Chen, S. M. Tang, M. Q. Ge, H. Wei, Y. F. Guan, G. J. Zhao, *ACS Sens.*, 2020, **5**, 837–844.
